# Supplementary material for: Target-induced duplex–triplex transition for ratiometric detection of adenosine triphosphate
Source: Royal Society of Chemistry journal article supplement (doi:10.1039/c7ay00507e), 2017-01-01
Supplement: c7ay00507e1.pdf [file c7ay00507e1.pdf]

## Supplementary Information

### Target induced duplex-triplex transition for ratiometric detection of adenosine triphosphate

*Shujuan Yao,<sup>s a</sup> Yanhua Gao,<sup>s a</sup> Wen Wang,<sup>a</sup> Donghua Ni,<sup>b</sup> Kaixian Zhang,<sup>a</sup> Ling Li,<sup>a</sup>  
Jianqiang Du,<sup>a</sup> Xiujuan Cui<sup>a\*</sup>*

<sup>a</sup>Department of Obstetrics and Gynecology, Department of Hematology, Tengzhou  
Central People's Hospital, No.181 Xingtian Road, Shandong 277500, P.R. China.

<sup>b</sup>School of Life Science, Shandong University, Jinan 250199, P. R. China

\*To whom correspondence should be addressed. E-mail: zhaoyi\_2005@163.com

**Table S1.** Oligonucleotide sequences used in this work

| Name | Sequence (from 5 to 3)                                             |
|------|--------------------------------------------------------------------|
| AS   | <i>FAM-GAG<b>ACCTGGGGGAGTATTGCGGAGGAAGGT</b></i>                   |
| MS   | <i>CTCTCTCTACCT<u>GGGAGAG</u>-TAMRA</i>                            |
| CS   | <i>CCA<u>ACTCTCTCT</u>TAAACCCAGG<u>TCTCTCT</u>-BHQ<sub>2</sub></i> |

The boldface type is the aptamer sequence; the underlined sequences indicate the bases that form a triplex; the italic represents the fluorophores or quenchers.

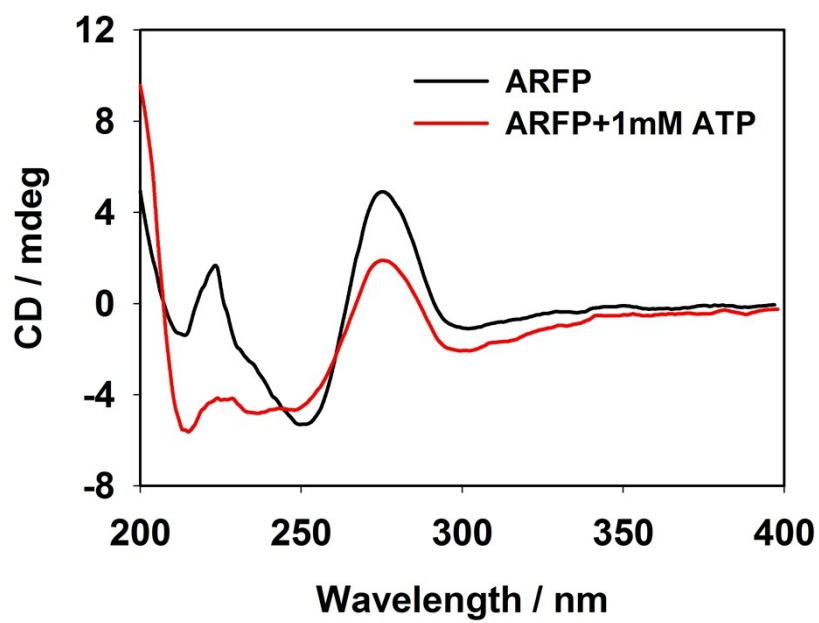

**Fig. S1** CD spectra of ARFP (black curve) and in the presence of 1 mM ATP (red curve). The concentration of ARFP was 200 nM.
